# Supplementary material for: Boron distributions in individual core–shell Ge/Si and Si/Ge heterostructured nanowires
Source: Royal Society of Chemistry journal article supplement (doi:10.1039/c6nr04384d), 2016-01-01
Supplement: c6nr04384d1.pdf [file c6nr04384d1.pdf]

## Boron Distributions in Individual Core-Shell Ge/Si and Si/Ge Heterostructured Nanowires

Bin Han,<sup>a,\*</sup> Yasuo Shimizu,<sup>a</sup> Jevasuwan Wipakorn,<sup>b</sup> Kotaro Nishibe,<sup>b, c</sup> Yuan Tu,<sup>a</sup> Koji Inoue,<sup>a</sup>  
Naoki Fukata<sup>b,\*</sup> and Yasuyoshi Nagai<sup>a</sup>

<sup>a</sup>The Oarai Center, Institute for Materials Research, Tohoku University, 2145-2 Narita, Oarai, Ibaraki 311-1313, Japan

<sup>b</sup>International Center for Materials Nanoarchitectonics, National Institute for Materials Science, 1-1 Namiki, Tsukuba, Ibaraki 305-0044, Japan

<sup>c</sup>Institute of Applied Physics, University of Tsukuba, Tsukuba, Ibaraki 305-8573, Japan

Correspondence and requests for materials should be addressed to Bin Han (email: hanbin@imr.tohoku.ac.jp) or to

Naoki Fukata (email: FUKATA.Naoki@nims.go.jp)

### SUPPORTING INFORMATION

Additional figures:

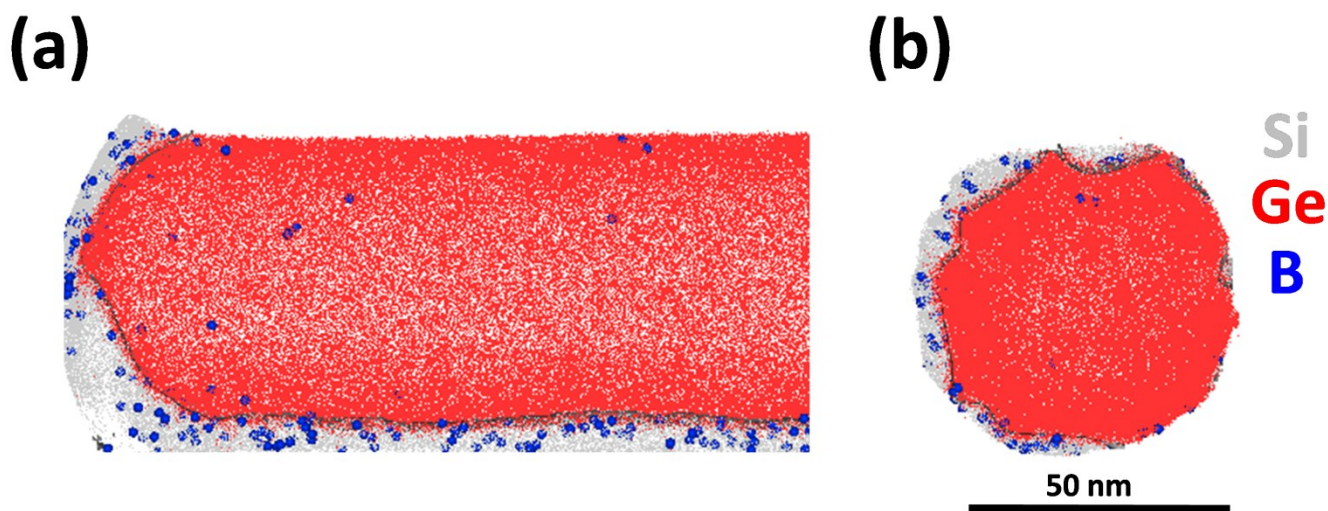

**Fig. S1** Atom maps of a Ge/Si core-shell nanowire (NW) measured directly by APT without Ga ion milling. (a) side view and (b) top view of 10-nm-thick sliced atom maps. The 20 at.% Si iso-concentration surface is also shown. Due to the limited APT field-of-view, only a very thin Si shell could be detected.

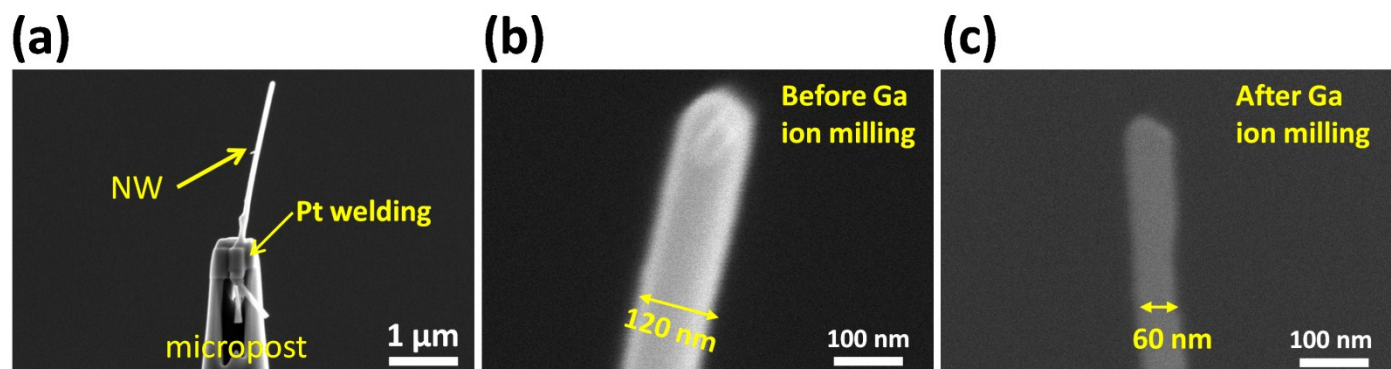

**Fig. S2** In order to study the B distribution in the Si shells of Ge/Si core-shell NWs, NWs were milled by Ga focused ion beam (5 kV, 43 pA) before APT measurement. (a) a Ge/Si core-shell NW welded to a micropost. Top part of the NW (b) before and (c) after Ga ion milling.
